# Supplementary material
Source: Springer Nature journal article supplement (https://www.springermedizin.de/resource/supplementary/12969_2009_386_MOESM3_ESM.pdf/9592926)

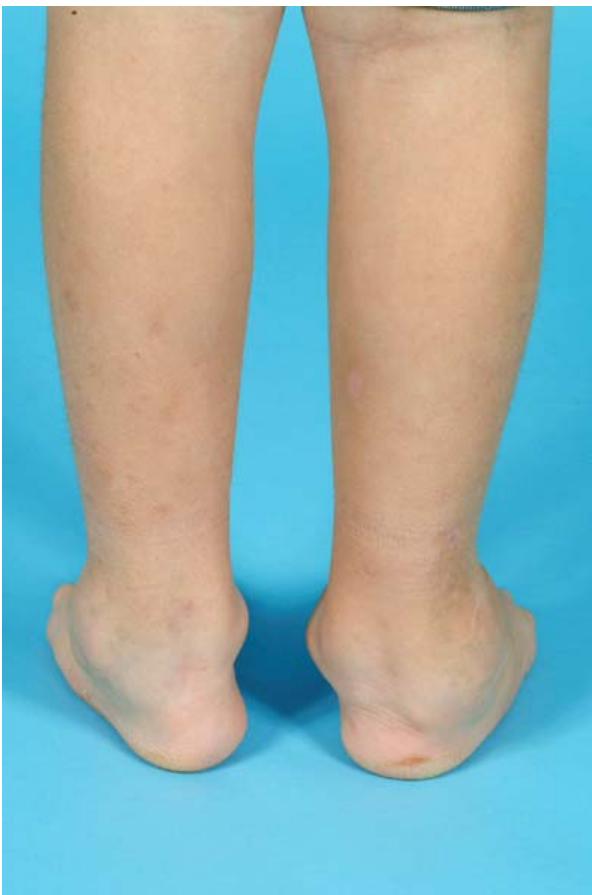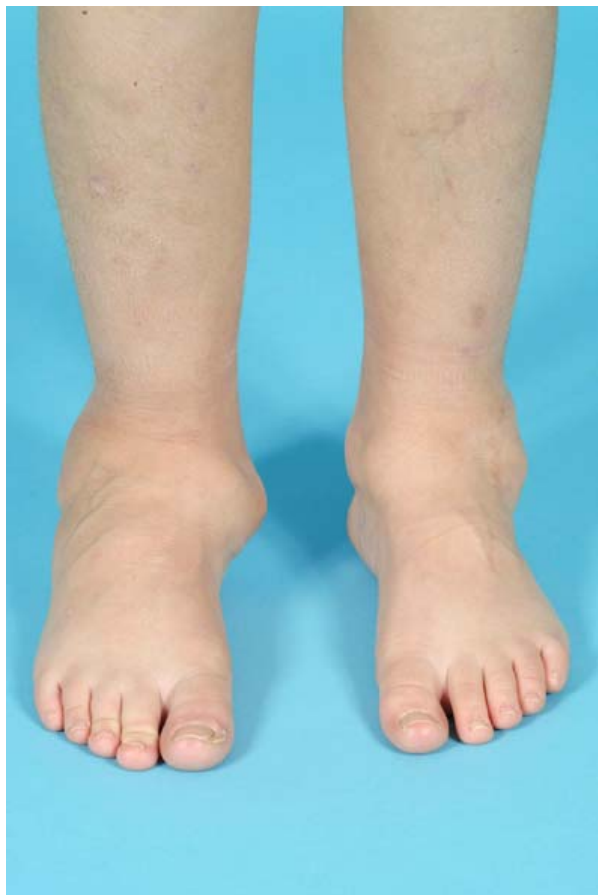

Supplement: MOESM3 [file 9592926]
